# Supplementary material for: Functional Organization for Response Inhibition in the Right Inferior Frontal Cortex of Individual Human Brains
Source: PubMed Central journal article supplement (PMC7609925; doi:10.1093/cercor/bhaa188), 2020-07-15
Supplement: suptable2_bhaa188.pdf [file suptable2_bhaa188.pdf]

**Supplementary Table 2. Classifications of the six group-level parcels according to the previous studies.**

|              | <b>Schaefer et al.,<br/>2018<br/>(300)</b> | <b>Glasser et al.,<br/>2016<br/>(360)</b> | <b>Gordon et al.,<br/>2016<br/>(333)</b> | <b>Finn et al.,<br/>2015<br/>(268)</b> | <b>Shen et al.,<br/>2013<br/>(278)</b> | <b>Craddock et al.,<br/>2012<br/>(300)</b> | <b>Bellec et al.,<br/>2010<br/>(325)</b> |
|--------------|--------------------------------------------|-------------------------------------------|------------------------------------------|----------------------------------------|----------------------------------------|--------------------------------------------|------------------------------------------|
| <b>vpIFC</b> | SalVentAttnA_FrOper_1                      | R_FOP1                                    | R_CinguloOperc_38                        | 61 Motor                               | R.BA44.2                               | 124                                        | 218                                      |
| <b>dpIFC</b> | ContA_PFCI_1/3                             | R_6r                                      | R_DorsalAttn_32                          | 21 Frontoparietal                      | R.BA44.2                               | 161                                        | 319                                      |
| <b>IFJ</b>   | ContA_PFCI_4                               | R_IFJp                                    | R_DorsalAttn_32                          | 22 Frontoparietal                      | R.BA44.1                               | 39                                         | 319                                      |
| <b>mIFC</b>  | DefaultB_PFCv_3                            | R_44/45                                   | R_VentralAttn_18                         | 16 Medial frontal                      | R.BA47.4                               | 280                                        | 300                                      |
| <b>vPCS</b>  | ContA_PFCI_3                               | R_6v                                      | R_DorsalAttn_32                          | 21 Frontoparietal                      | R.BA6.9                                | 148                                        | 319                                      |
| <b>dPCS</b>  | SalVentAttnA_PrC_1                         | R_PEF                                     | R_DorsalAttn_31                          | 31 Frontoparietal                      | R.BA6.6                                | 39                                         | 319                                      |

(total number of parcels)
